# Supplementary material
Source: Springer Nature journal article supplement (https://www.springermedizin.de/resource/supplementary/12935_2003_34_MOESM2_ESM.pdf/9540904)
Supplement: MOESM2 [file 9540904]

CONSENSUS

RCLCLVF<sup>T</sup>LLHL

|                   |   |                                                             |                                                                  |                                                                                                                           |    |
|-------------------|---|-------------------------------------------------------------|------------------------------------------------------------------|---------------------------------------------------------------------------------------------------------------------------|----|
| CCN3 (NOV)        | 1 | <b>m</b> qsvqstsfc <b>l</b> rk                              | <b>Q</b> C <b>L</b> T <b>F</b> L <b>L</b> H <b>L</b>             | <b>l</b> gqva <b>a</b> t                                                                                                  | 32 |
| CCN2 (CTGF)       | 1 | mtaasmgpv                                                   | <b>R</b> VAFVV LLAL                                              | csrpav <b>g</b>                                                                                                           | 26 |
| CCN1 (CYR61)      | 1 | mssria                                                      | <b>R</b> ALALVVT <b>L</b> LHL                                    | trlal <b>s</b> t                                                                                                          | 23 |
| CCN4 (WISP1/ELM1) | 1 | mrwflpw <b>t</b> laavt                                      |                                                                  | aaa <b>s</b> t <b>v</b> l <b>a</b> talsp <b>a</b> p <b>t</b> tm <b>d</b> ft <b>p</b>                                      | 36 |
| CCN5 (WISP2/COP1) | 1 | mr <b>g</b> tp                                              | <b>K</b> TH <b>L</b> L <b>A</b> F <b>S</b> L <b>L</b> C <b>L</b> | <b>l</b> sk <b>v</b> r <b>t</b>                                                                                           | 23 |
| CCN6 (WISP3)      | 1 | mqg <b>l</b> l <b>f</b> s <b>t</b> l <b>l</b> l <b>l</b> ag |                                                                  | <b>l</b> aq <b>f</b> c <b>c</b> r <b>v</b> q <b>g</b> t <b>g</b> p <b>l</b> d <b>t</b> t <b>p</b> e <b>g</b> r <b>p</b> g | 36 |

CONSENSUS

QFCP

PCRCP

QPPPRCPPGVSLVLDGCGCCKVCA

|                   |    |                                       |                       |     |                                |                                           |                                                                                                                  |    |
|-------------------|----|---------------------------------------|-----------------------|-----|--------------------------------|-------------------------------------------|------------------------------------------------------------------------------------------------------------------|----|
| CCN3 (NOV)        | 33 |                                       | <b>Q</b> R <b>C</b> P | pqc | <b>P</b> G <b>R</b> <b>C</b> P | <b>A</b> T <b>P</b> P <b>T</b> <b>C</b>   | <b>A</b> P <b>G</b> V <b>R</b> A <b>V</b> L <b>D</b> G <b>C</b> <b>S</b> <b>C</b> <b>C</b> L <b>V</b> C <b>A</b> | 68 |
| CCN2 (CTGF)       | 27 |                                       | <b>Q</b> N <b>C</b> S | g   | <b>P</b> C <b>R</b> <b>C</b> P | <b>d</b> E <b>P</b> A <b>P</b> R <b>C</b> | <b>P</b> A <b>G</b> V <b>S</b> L <b>V</b> L <b>D</b> G <b>C</b> <b>G</b> <b>C</b> <b>C</b> R <b>V</b> C <b>A</b> | 61 |
| CCN1 (CYR61)      | 24 |                                       |                       | a   | <b>A</b> C <b>H</b> <b>C</b> P | <b>L</b> E <b>A</b> P <b>K</b> <b>C</b>   | <b>A</b> P <b>G</b> V <b>G</b> L <b>V</b> R <b>D</b> G <b>C</b> <b>G</b> <b>C</b> <b>C</b> K <b>V</b> C <b>A</b> | 57 |
| CCN4 (WISP1/ELM1) | 37 | ap <b>l</b> ed <b>t</b> ss <b>r</b> p | <b>Q</b> F <b>C</b> K | w   | <b>P</b> C <b>E</b> <b>C</b> P | <b>P</b> S <b>P</b> P <b>R</b> <b>C</b>   | <b>P</b> L <b>G</b> V <b>S</b> L <b>I</b> T <b>D</b> G <b>C</b> <b>E</b> <b>C</b> <b>C</b> K <b>M</b> C <b>A</b> | 80 |
| CCN5 (WISP2/COP1) | 24 |                                       | <b>Q</b> L <b>C</b> P | t   | <b>P</b> C <b>T</b> <b>C</b> P | <b>W</b> P <b>P</b> P <b>R</b> <b>C</b>   | <b>P</b> L <b>G</b> V <b>P</b> L <b>V</b> L <b>D</b> G <b>C</b> <b>G</b> <b>C</b> <b>C</b> R <b>V</b> C <b>A</b> | 57 |
| CCN6 (WISP3)      | 37 | evsdapq <b>r</b> k                    | <b>Q</b> F <b>C</b> H | w   | <b>P</b> C <b>K</b> <b>C</b> P | <b>Q</b> Q <b>K</b> P <b>R</b> <b>C</b>   | <b>P</b> P <b>G</b> V <b>S</b> L <b>V</b> R <b>D</b> G <b>C</b> <b>G</b> <b>C</b> <b>C</b> K <b>I</b> C <b>A</b> | 79 |

CONSENSUS

KQLGESCS**E**ADPCDPH KGLYCDY**G**ADRP RY TGVCCA

VE GAGC

|                   |    |                                                                                         |                                                                              |                       |                                  |                                  |                       |                                           |     |
|-------------------|----|-----------------------------------------------------------------------------------------|------------------------------------------------------------------------------|-----------------------|----------------------------------|----------------------------------|-----------------------|-------------------------------------------|-----|
| CCN3 (NOV)        | 69 | <b>R</b> Q <b>R</b> G <b>E</b> S <b>C</b> S <b>D</b> L <b>E</b> P <b>C</b> D <b>E</b> S | <b>S</b> G <b>L</b> Y <b>C</b> D <b>R</b> S <b>A</b> D                       | <b>P</b> s <b>N</b> Q | <b>T</b> G <b>I</b> C <b>T</b> A | <b>V</b> E                       | <b>G</b> D <b>N</b> C | 110                                       |     |
| CCN2 (CTGF)       | 62 | <b>K</b> Q <b>L</b> G <b>E</b> L <b>C</b> T <b>E</b> R <b>D</b> P <b>C</b> D <b>P</b> H | <b>K</b> G <b>L</b> F <b>C</b> D <b>F</b> G <b>S</b> P <b>A</b> N            | <b>R</b> K            | <b>I</b> G <b>V</b> C <b>T</b> A | <b>K</b> D                       | <b>G</b> A <b>P</b> C | 103                                       |     |
| CCN1 (CYR61)      | 58 | <b>K</b> Q <b>L</b> N <b>E</b> D <b>C</b> S <b>K</b> T <b>Q</b> P <b>C</b> D            | <b>H</b> t <b>K</b> G <b>L</b> E <b>C</b> N <b>F</b> G <b>A</b> S <b>S</b> T | <b>A</b> L            | <b>K</b> G <b>I</b> C <b>R</b> A | <b>q</b>                         | <b>S</b> E            | <b>G</b> R <b>P</b> C                     | 100 |
| CCN4 (WISP1/ELM1) | 81 | <b>Q</b> Q <b>L</b> G <b>D</b> N <b>C</b> T <b>E</b> A <b>A</b> I <b>C</b> D <b>P</b> H | <b>R</b> G <b>L</b> Y <b>C</b> D <b>Y</b> S <b>G</b> D <b>R</b> P            | <b>R</b> Y <b>a</b>   | <b>I</b> G <b>V</b>              | <b>q</b>                         | <b>V</b> V            | <b>G</b> V <b>G</b> C                     | 123 |
| CCN5 (WISP2/COP1) | 58 | <b>R</b> R <b>L</b> G <b>E</b> P <b>C</b> D <b>Q</b> L <b>H</b> V <b>C</b> D <b>A</b> S | <b>Q</b> G <b>L</b> V <b>C</b> Q <b>P</b> G <b>A</b>                         | <b>G</b> P            | <b>G</b> G                       | <b>R</b> G <b>A</b> L <b>C</b> L | <b>l</b>              | <b>A</b> E <b>d</b> D <b>S</b> S <b>C</b> | 100 |
| CCN6 (WISP3)      | 80 | <b>K</b> Q <b>P</b> G <b>E</b> I <b>C</b> N <b>E</b> A <b>D</b> L <b>C</b> D <b>P</b> H | <b>K</b> G <b>L</b> Y <b>C</b> D <b>Y</b> S <b>V</b> D <b>R</b> P            | <b>R</b> Y <b>e</b>   | <b>T</b> G <b>V</b>              | <b>q</b>                         | <b>V</b>              | <b>A</b> V <b>G</b> C                     | 122 |

CONSENSUS

EFNGVIYRNGESFQPNCKYQCTCIDGAIGCVPLC

DVRLPNPDCPHP

|                   |     |                                                                                         |                                  |                                           |                                           |                       |                                                                   |     |
|-------------------|-----|-----------------------------------------------------------------------------------------|----------------------------------|-------------------------------------------|-------------------------------------------|-----------------------|-------------------------------------------------------------------|-----|
| CCN3 (NOV)        | 111 | <b>V</b> F <b>D</b> G <b>V</b> I <b>Y</b> R <b>S</b> G <b>E</b> K <b>F</b> Q <b>P</b> S | <b>C</b> K <b>F</b> Q <b>C</b> T | <b>C</b> R <b>D</b> G <b>Q</b> I <b>G</b> | <b>C</b> V <b>P</b> R <b>C</b>            | <b>q</b> l            | <b>D</b> V <b>L</b> L <b>P</b> E <b>P</b> N <b>C</b> P <b>A</b> P | 158 |
| CCN2 (CTGF)       | 104 | <b>I</b> F <b>G</b> G <b>T</b> V <b>Y</b> R <b>S</b> G <b>E</b> S <b>F</b> Q <b>S</b> S | <b>C</b> K <b>Y</b> Q <b>C</b> T | <b>C</b> L <b>D</b> G <b>A</b> V <b>G</b> | <b>C</b> M <b>P</b> L <b>C</b>            | <b>s</b> m            | <b>D</b> V <b>R</b> L <b>P</b> S <b>P</b> D <b>C</b> P <b>F</b> P | 151 |
| CCN1 (CYR61)      | 101 | <b>E</b> Y <b>N</b> S <b>R</b> I <b>Y</b> Q <b>N</b> G <b>E</b> S <b>F</b> Q <b>P</b> N | <b>C</b> K <b>H</b> Q <b>C</b> T | <b>C</b> I <b>D</b> G <b>A</b> V <b>G</b> | <b>C</b> I <b>P</b> L <b>C</b>            | <b>p</b> q            | <b>E</b> L <b>S</b> L <b>P</b> N <b>L</b> G <b>C</b> P <b>N</b> P | 148 |
| CCN4 (WISP1/ELM1) | 124 | <b>V</b> L <b>D</b> G <b>V</b> R <b>Y</b> N <b>N</b> Q <b>S</b> F <b>Q</b> P <b>N</b>   | <b>C</b> K <b>Y</b> N <b>C</b> T | <b>C</b> I <b>D</b> G <b>A</b> V <b>G</b> | <b>C</b> T <b>P</b> L <b>C</b>            | <b>l</b>              | <b>R</b> V <b>R</b> P <b>P</b> R <b>L</b> W <b>C</b> P <b>H</b> P | 170 |
| CCN5 (WISP2/COP1) | 101 | <b>E</b> V <b>N</b> G <b>R</b> L <b>Y</b> R <b>E</b> G <b>E</b> T <b>F</b> Q <b>P</b> H | <b>C</b> S <b>I</b> R <b>C</b> R | <b>C</b> E <b>D</b> G <b>G</b> F <b>T</b> | <b>C</b> V <b>P</b> L <b>C</b>            | <b>s</b> e            | <b>D</b> V <b>R</b> L <b>P</b> S <b>W</b> D <b>C</b> P <b>H</b> P | 148 |
| CCN6 (WISP3)      | 123 | <b>E</b> F <b>N</b> Q <b>V</b> H <b>Y</b> H <b>N</b> G <b>Q</b> V <b>F</b> Q <b>P</b> N | <b>P</b> L <b>F</b> S            | <b>C</b> L                                | <b>C</b> V <b>S</b> G <b>A</b> I <b>G</b> | <b>T</b> P <b>L</b> F | <b>i</b> p                                                        | 158 |

CONSENSUS

RRVEVPK**C**CEEWVC

DED

|                   |     |                                                                                       |                                |                                                                                                                                                                    |     |
|-------------------|-----|---------------------------------------------------------------------------------------|--------------------------------|--------------------------------------------------------------------------------------------------------------------------------------------------------------------|-----|
| CCN3 (NOV)        | 159 | <b>R</b> K <b>V</b> E <b>V</b> P <b>G</b> E <b>C</b> C <b>E</b> K <b>W</b> I <b>C</b> | <b>g</b> p <b>D</b> E <b>E</b> | <b>d</b> s <b>l</b> g <b>g</b> l <b>t</b> l <b>a</b> a <b>y</b> r <b>p</b> e <b>a</b> t <b>l</b> g <b>v</b> e <b>v</b> s <b>d</b> s <b>s</b> v                     | 204 |
| CCN2 (CTGF)       | 152 | <b>R</b> R <b>V</b> K <b>L</b> P <b>G</b> K <b>C</b> C <b>E</b> E <b>W</b> V <b>C</b> | <b>D</b> E <b>P</b>            | <b>k</b> d <b>q</b> t <b>v</b> v <b>g</b> p <b>a</b> l <b>a</b> a <b>y</b> r <b>l</b> e <b>d</b> t <b>f</b> g <b>p</b> d <b>p</b> t <b>m</b> i <b>r</b> a          | 197 |
| CCN1 (CYR61)      | 149 | <b>R</b> L <b>V</b> K <b>V</b> T <b>G</b> Q <b>C</b> C <b>E</b> W <b>V</b> C          | <b>D</b> E <b>D</b>            | <b>s</b> i <b>k</b> d <b>p</b> m <b>e</b> d <b>q</b> d <b>g</b> l <b>l</b> g <b>k</b> e <b>l</b> g <b>f</b> d <b>a</b> s <b>e</b> v <b>e</b> l <b>t</b> r <b>n</b> | 195 |
| CCN4 (WISP1/ELM1) | 171 | <b>R</b> R <b>V</b> S <b>I</b> P <b>G</b> H <b>C</b> C <b>E</b> Q <b>W</b> V <b>C</b> | <b>E</b> D <b>D</b>            | <b>a</b> k <b>r</b> p <b>r</b> k <b>t</b> a <b>p</b> r <b>d</b> t <b>g</b> a <b>f</b> d <b>a</b> v <b>g</b> e <b>v</b> e <b>a</b> w <b>h</b> r                     | 214 |
| CCN5 (WISP2/COP1) | 149 | <b>R</b> R <b>V</b> E <b>V</b> L <b>G</b> K <b>C</b> C <b>P</b> E <b>W</b> V <b>C</b> | <b>G</b> Q <b>G</b>            | <b>g</b> g <b>l</b> g <b>t</b> q <b>p</b> l <b>p</b> a <b>q</b> g <b>p</b> q <b>f</b> s <b>g</b> l <b>v</b> s <b>s</b> l <b>p</b> p <b>g</b> v                     | 192 |
| CCN6 (WISP3)      | 159 |                                                                                       |                                | <b>k</b> l <b>a</b> g <b>s</b> h <b>c</b> s <b>g</b> a <b>k</b> g <b>g</b> k <b>s</b> d <b>q</b> s <b>n</b> c <b>s</b> l <b>e</b> p <b>l</b> l <b>q</b> q          | 187 |
